# Supplementary material for: Multiscale Modeling of Germinal Center Recapitulates the Temporal Transition From Memory B Cells to Plasma Cells Differentiation as Regulated by Antigen Affinity-Based Tfh Cell Help
Source: PubMed Central journal article supplement (PMC7892951; doi:10.3389/fimmu.2020.620716), 2021-02-05
Supplement: DataSheet_1.pdf [file DataSheet_1.pdf]

Ag saturation per FDC fragment in units of threshold. 1:constant finding probability  
20  
Presented Antigen per FDC  
3000  
Threshold Ag-concentration for binding CC (in Mol):  
1e-08  
B-Cell Speed (um / hr)  
0.18  
B-Cell Persistent Time average (hr.)  
0.08  
deviation of B-cell speed (um/hr.)  
-1  
B-Cell Persistent Time stddev (hr.)  
0  
Size of initial B-cell receptor pool  
100  
Length of BCRs  
4  
Lattice Chemokine Constant (um)  
5  
Maximum weigh of chemotaxis  
10  
Steepness of weight reduction with chemokine gradient (mol/l)  
0.132845  
Chemokine gradient of half weight (l/mol)  
1.50551  
Critical CXCL12 concentration for desensitization (mol)  
451.654  
Critical CXCL13 concentration for desensitization (mol) //(-1 for none)?????  
6.02205  
Critical CXCL12 concentration for resensitization (mol)  
301.103  
Critical CXCL13 concentration for resensitization (mol) //(-1 for none)?????  
4.51654  
Phase g1 of cell cycle (hr.)  
2.5  
Phase S of cell cycle (hr.)  
1.5  
Phase g2 of cell cycle (hr.)  
2.5  
Phase M of cell cycle (hr.)  
0.5  
Phase g1 of cell cycle stddev (hr.)  
1  
Phase S of cell cycle stddev (hr.)  
1  
Phase g2 of cell cycle stddev (hr.)  
1  
Phase M of cell cycle stddev (hr.)  
1  
Duration of CC collection of Antigen by serial encounters with FDC (hr.)  
0.7  
Standard deviation for delay to differentiation.

0  
Centroblast radius (um)

2.45  
Delay cell differentiation after TC selection (hr.)

6  
Lattice Dimensions

3  
Lattice Constant (um)

5  
Time resolution (hr)

0.002  
Length FDC dendrites / dx (number of positions)

8  
Retained Ag is deleted in fresh CC

1  
Conversion of shape space affinity to (1/mol)

5.5  
Conversion of shape space affinity to (1/mol)

9.5  
Exponent of the hamming distance

2  
Width of gaussian affinity weight function

2.8  
Initial Number Stromal cells

300  
Initial Number FDCs

200  
Initial Number T-cells

250  
Initial Number Centroblasts

0  
 $k_{on}$  for building immune complex (1/mol h)

36  
 $k_{off}$  for dissociation of immune complex (in /s):

3.6  
Rate of macrophage transport of dead cells (h):

0.000231049  
Maximum number of residues in one dimension

9  
Number of divisions of founder cells

12  
stddev of Number of divisions of founder cells

0  
Number of divisions of influx Bcells

6  
FounderCellsDoNotMutate

0  
Plasma Cell persistence time (unit)

0.16  
Plasma Cell speed (unit)

0.072  
Plasma Cell polarity (degrees)

-1  
Probability to be selected by FDC.

0.04

% Casp3+ LZ cells per hr. used as (apoptosis rate)

0

% Casp3+ DZ cells per hr. used as (apoptosis rate)

0

Differentiation rate

0.02

p-MHC dependent division number Hill (Hill coef. n\_P)

2

p-MHC dependent division number Hill (Hill coef. P\_Min)

1

p-MHC dependent division number Hill (Hill coef. P\_Max)

6

p-MHC dependent division number Hill (Hill coef. K\_P)

9

Probability of mutation before first 24 hours

0

Probability of mutation after first 24 hours

0.5

Probability of mutation after selection (affinity dependant)

0

Affinity dependant mutation upon TC contact (affinity-exponent)

1

Probability to divide Ag assymmetrically to daughter B-cell

0.72

Assymmetric Distribution of Ag

1

Lattice Radius (um)

160

rate of inflow (cells/hr.)

2

Start of mutation period (hr.)

24

smoothness of stop inflow CB (hr.) (-1 = no)

6

time to stop inflow CB (hr.)

96

T-Cell Speed (um / hr.)

0.24

T-Cell Persistent Time average (hr.)

0.0705882

deviation of T-cell speed (um/sec)

-1

T-Cell Persistent Time stddev (hr.)

0

Duration of CC-Tc contact (hr.)

0.6

Minimum duration of TC-CC-polarization for CC-rescue (hr.)

0.5

Maximum duration of GC simulation (hr.)

504

Rate for differentiation of centroblasts to centrocytes

0.1

Time gap between TFHC-CC binding tests (hr.)

10

Coefficient of variation around Polarity Index

0.04

Ag saturation per FDC fragment in units of threshold. 1:constant finding probability  
20  
Presented Antigen per FDC  
3000  
Threshold Ag-concentration for binding CC (in Mol):  
1e-08  
B-Cell Speed (um / hr)  
0.18  
B-Cell Persistent Time average (hr.)  
0.08  
deviation of B-cell speed (um/hr.)  
-1  
B-Cell Persistent Time stddev (hr.)  
0  
Size of initial B-cell receptor pool  
100  
Length of BCRs  
4  
Lattice Chemokine Constant (um)  
5  
Maximum weigh of chemotaxis  
10  
Steepness of weight reduction with chemokine gradient (mol/l)  
0.132845  
Chemokine gradient of half weight (l/mol)  
1.50551  
Critical CXCL12 concentration for desensitization (mol)  
451.654  
Critical CXCL13 concentration for desensitization (mol) //(-1 for none)?????  
6.02205  
Critical CXCL12 concentration for resensitization (mol)  
301.103  
Critical CXCL13 concentration for resensitization (mol) //(-1 for none)?????  
4.51654  
Phase g1 of cell cycle (hr.)  
2.5  
Phase S of cell cycle (hr.)  
1.5  
Phase g2 of cell cycle (hr.)  
2.5  
Phase M of cell cycle (hr.)  
0.5  
Phase g1 of cell cycle stddev (hr.)  
1  
Phase S of cell cycle stddev (hr.)  
1  
Phase g2 of cell cycle stddev (hr.)  
1  
Phase M of cell cycle stddev (hr.)  
1  
Duration of CC collection of Antigen by serial encounters with FDC (hr.)  
0.7  
Standard deviation for delay to differentiation.

0  
Centroblast radius (um)

2.45  
Delay cell differentiation after TC selection (hr.)

6  
Lattice Dimensions

3  
Lattice Constant (um)

5  
Time resolution (hr)

0.002  
Length FDC dendrites / dx (number of positions)

8  
Retained Ag is deleted in fresh CC

1  
Conversion of shape space affinity to (1/mol)

5.5  
Conversion of shape space affinity to (1/mol)

9.5  
Exponent of the hamming distance

2  
Width of gaussian affinity weight function

2.8  
Initial Number Stromal cells

300  
Initial Number FDCs

200  
Initial Number T-cells

250  
Initial Number Centroblasts

0  
 $k_{on}$  for building immune complex (1/mol h)

36  
 $k_{off}$  for dissociation of immune complex (in /s):

3.6  
Rate of macrophage transport of dead cells (h):

0.000231049  
Maximum number of residues in one dimension

9  
Number of divisions of founder cells

12  
stddev of Number of divisions of founder cells

0  
Number of divisions of influx Bcells

6  
FounderCellsDoNotMutate

0  
Plasma Cell persistence time (unit)

0.16  
Plasma Cell speed (unit)

0.072  
Plasma Cell polarity (degrees)

-1  
Probability to be selected by FDC.

0.04

% Casp3+ LZ cells per hr. used as (apoptosis rate)

0

% Casp3+ DZ cells per hr. used as (apoptosis rate)

0

Differentiation rate

0.02

p-MHC dependent division number Hill (Hill coef. n\_P)

2

p-MHC dependent division number Hill (Hill coef. P\_Min)

1

p-MHC dependent division number Hill (Hill coef. P\_Max)

6

p-MHC dependent division number Hill (Hill coef. K\_P)

9

Probability of mutation before first 24 hours

0

Probability of mutation after first 24 hours

0.5

Probability of mutation after selection (affinity dependant)

0

Affinity dependant mutation upon TC contact (affinity-exponent)

1

Probability to divide Ag assymmetrically to daughter B-cell

0.72

Assymmetric Distribution of Ag

1

Lattice Radius (um)

160

rate of inflow (cells/hr.)

2

Start of mutation period (hr.)

24

smoothness of stop inflow CB (hr.) (-1 = no)

6

time to stop inflow CB (hr.)

96

T-Cell Speed (um / hr.)

0.24

T-Cell Persistent Time average (hr.)

0.0705882

deviation of T-cell speed (um/sec)

-1

T-Cell Persistent Time stddev (hr.)

0

Duration of CC-Tc contact (hr.)

0.6

Minimum duration of TC-CC-polarization for CC-rescue (hr.)

0.5

Maximum duration of GC simulation (hr.)

504

Rate for differentiation of centroblasts to centrocytes

0.1

Time gap between TFHC-CC binding tests (hr.)

10

Coefficient of variation around Polarity Index

0.04



Ag saturation per FDC fragment in units of threshold. 1:constant finding probability  
20  
Presented Antigen per FDC  
3000  
Threshold Ag-concentration for binding CC (in Mol):  
1e-08  
B-Cell Speed (um / hr)  
0.18  
B-Cell Persistent Time average (hr.)  
0.08  
deviation of B-cell speed (um/hr.)  
-1  
B-Cell Persistent Time stddev (hr.)  
0  
Size of initial B-cell receptor pool  
100  
Length of BCRs  
4  
Lattice Chemokine Constant (um)  
5  
Maximum weigh of chemotaxis  
10  
Steepness of weight reduction with chemokine gradient (mol/l)  
0.132845  
Chemokine gradient of half weight (l/mol)  
1.50551  
Critical CXCL12 concentration for desensitization (mol)  
451.654  
Critical CXCL13 concentration for desensitization (mol) //(-1 for none)?????  
6.02205  
Critical CXCL12 concentration for resensitization (mol)  
301.103  
Critical CXCL13 concentration for resensitization (mol) //(-1 for none)?????  
4.51654  
Phase g1 of cell cycle (hr.)  
2.5  
Phase S of cell cycle (hr.)  
1.5  
Phase g2 of cell cycle (hr.)  
2.5  
Phase M of cell cycle (hr.)  
0.5  
Phase g1 of cell cycle stddev (hr.)  
1  
Phase S of cell cycle stddev (hr.)  
1  
Phase g2 of cell cycle stddev (hr.)  
1  
Phase M of cell cycle stddev (hr.)  
1  
Duration of CC collection of Antigen by serial encounters with FDC (hr.)  
0.7  
Standard deviation for delay to differentiation.

0  
Centroblast radius (um)

2.45  
Delay cell differentiation after TC selection (hr.)

6  
Lattice Dimensions

3  
Lattice Constant (um)

5  
Time resolution (hr)

0.002  
Length FDC dendrites / dx (number of positions)

8  
Retained Ag is deleted in fresh CC

1  
Conversion of shape space affinity to (1/mol)

5.5  
Conversion of shape space affinity to (1/mol)

9.5  
Exponent of the hamming distance

2  
Width of gaussian affinity weight function

2.8  
Initial Number Stromal cells

300  
Initial Number FDCs

200  
Initial Number T-cells

250  
Initial Number Centroblasts

0  
 $k_{on}$  for building immune complex (1/mol h)

36  
 $k_{off}$  for dissociation of immune complex (in /s):

3.6  
Rate of macrophage transport of dead cells (h):

0.000231049  
Maximum number of residues in one dimension

9  
Number of divisions of founder cells

12  
stddev of Number of divisions of founder cells

0  
Number of divisions of influx Bcells

6  
FounderCellsDoNotMutate

0  
Plasma Cell persistence time (unit)

0.16  
Plasma Cell speed (unit)

0.072  
Plasma Cell polarity (degrees)

-1  
Probability to be selected by FDC.

0.04

% Casp3+ LZ cells per hr. used as (apoptosis rate)

0

% Casp3+ DZ cells per hr. used as (apoptosis rate)

0

Differentiation rate

0.02

p-MHC dependent division number Hill (Hill coef. n\_P)

2

p-MHC dependent division number Hill (Hill coef. P\_Min)

1

p-MHC dependent division number Hill (Hill coef. P\_Max)

6

p-MHC dependent division number Hill (Hill coef. K\_P)

9

Probability of mutation before first 24 hours

0

Probability of mutation after first 24 hours

0.5

Probability of mutation after selection (affinity dependant)

0

Affinity dependant mutation upon TC contact (affinity-exponent)

1

Probability to divide Ag assymmetrically to daughter B-cell

0.72

Assymmetric Distribution of Ag

1

Lattice Radius (um)

160

rate of inflow (cells/hr.)

2

Start of mutation period (hr.)

24

smoothness of stop inflow CB (hr.) (-1 = no)

6

time to stop inflow CB (hr.)

96

T-Cell Speed (um / hr.)

0.24

T-Cell Persistent Time average (hr.)

0.0705882

deviation of T-cell speed (um/sec)

-1

T-Cell Persistent Time stddev (hr.)

0

Duration of CC-Tc contact (hr.)

0.6

Minimum duration of TC-CC-polarization for CC-rescue (hr.)

0.5

Maximum duration of GC simulation (hr.)

504

Rate for differentiation of centroblasts to centrocytes

0.1

Time gap between TFHC-CC binding tests (hr.)

10

Coefficient of variation around Polarity Index

0.04

Ag saturation per FDC fragment in units of threshold. 1:constant finding probability  
20  
Presented Antigen per FDC  
3000  
Threshold Ag-concentration for binding CC (in Mol):  
1e-08  
B-Cell Speed (um / hr)  
0.18  
B-Cell Persistent Time average (hr.)  
0.08  
deviation of B-cell speed (um/hr.)  
-1  
B-Cell Persistent Time stddev (hr.)  
0  
Size of initial B-cell receptor pool  
100  
Length of BCRs  
4  
Lattice Chemokine Constant (um)  
5  
Maximum weigh of chemotaxis  
10  
Steepness of weight reduction with chemokine gradient (mol/l)  
0.132845  
Chemokine gradient of half weight (l/mol)  
1.50551  
Critical CXCL12 concentration for desensitization (mol)  
451.654  
Critical CXCL13 concentration for desensitization (mol) //(-1 for none)?????  
6.02205  
Critical CXCL12 concentration for resensitization (mol)  
301.103  
Critical CXCL13 concentration for resensitization (mol) //(-1 for none)?????  
4.51654  
Phase g1 of cell cycle (hr.)  
2.5  
Phase S of cell cycle (hr.)  
1.5  
Phase g2 of cell cycle (hr.)  
2.5  
Phase M of cell cycle (hr.)  
0.5  
Phase g1 of cell cycle stddev (hr.)  
1  
Phase S of cell cycle stddev (hr.)  
1  
Phase g2 of cell cycle stddev (hr.)  
1  
Phase M of cell cycle stddev (hr.)  
1  
Duration of CC collection of Antigen by serial encounters with FDC (hr.)  
0.7  
Standard deviation for delay to differentiation.

0  
Centroblast radius (um)

2.45  
Delay cell differentiation after TC selection (hr.)

6  
Lattice Dimensions

3  
Lattice Constant (um)

5  
Time resolution (hr)

0.002  
Length FDC dendrites / dx (number of positions)

8  
Retained Ag is deleted in fresh CC

1  
Conversion of shape space affinity to (1/mol)

5.5  
Conversion of shape space affinity to (1/mol)

9.5  
Exponent of the hamming distance

2  
Width of gaussian affinity weight function

2.8  
Initial Number Stromal cells

300  
Initial Number FDCs

200  
Initial Number T-cells

250  
Initial Number Centroblasts

0  
 $k_{on}$  for building immune complex (1/mol h)

36  
 $k_{off}$  for dissociation of immune complex (in /s):

3.6  
Rate of macrophage transport of dead cells (h):

0.000231049  
Maximum number of residues in one dimension

9  
Number of divisions of founder cells

12  
stddev of Number of divisions of founder cells

0  
Number of divisions of influx Bcells

6  
FounderCellsDoNotMutate

0  
Plasma Cell persistence time (unit)

0.16  
Plasma Cell speed (unit)

0.072  
Plasma Cell polarity (degrees)

-1  
Probability to be selected by FDC.

0.04

% Casp3+ LZ cells per hr. used as (apoptosis rate)

0

% Casp3+ DZ cells per hr. used as (apoptosis rate)

0

Differentiation rate

0.02

p-MHC dependent division number Hill (Hill coef. n\_P)

2

p-MHC dependent division number Hill (Hill coef. P\_Min)

1

p-MHC dependent division number Hill (Hill coef. P\_Max)

6

p-MHC dependent division number Hill (Hill coef. K\_P)

9

Probability of mutation before first 24 hours

0

Probability of mutation after first 24 hours

0.5

Probability of mutation after selection (affinity dependant)

0

Affinity dependant mutation upon TC contact (affinity-exponent)

1

Probability to divide Ag assymmetrically to daughter B-cell

0.72

Assymmetric Distribution of Ag

1

Lattice Radius (um)

160

rate of inflow (cells/hr.)

2

Start of mutation period (hr.)

24

smoothness of stop inflow CB (hr.) (-1 = no)

6

time to stop inflow CB (hr.)

96

T-Cell Speed (um / hr.)

0.24

T-Cell Persistent Time average (hr.)

0.0705882

deviation of T-cell speed (um/sec)

-1

T-Cell Persistent Time stddev (hr.)

0

Duration of CC-Tc contact (hr.)

0.6

Minimum duration of TC-CC-polarization for CC-rescue (hr.)

0.5

Maximum duration of GC simulation (hr.)

504

Rate for differentiation of centroblasts to centrocytes

0.1

Time gap between TFHC-CC binding tests (hr.)

10

Coefficient of variation around Polarity Index

0.04



Ag saturation per FDC fragment in units of threshold. 1:constant finding probability  
20  
Presented Antigen per FDC  
3000  
Threshold Ag-concentration for binding CC (in Mol):  
1e-08  
B-Cell Speed (um / hr)  
0.18  
B-Cell Persistent Time average (hr.)  
0.08  
deviation of B-cell speed (um/hr.)  
-1  
B-Cell Persistent Time stddev (hr.)  
0  
Size of initial B-cell receptor pool  
100  
Length of BCRs  
4  
Lattice Chemokine Constant (um)  
5  
Maximum weigh of chemotaxis  
10  
Steepness of weight reduction with chemokine gradient (mol/l)  
0.132845  
Chemokine gradient of half weight (l/mol)  
1.50551  
Critical CXCL12 concentration for desensitization (mol)  
451.654  
Critical CXCL13 concentration for desensitization (mol) //(-1 for none)?????  
6.02205  
Critical CXCL12 concentration for resensitization (mol)  
301.103  
Critical CXCL13 concentration for resensitization (mol) //(-1 for none)?????  
4.51654  
Phase g1 of cell cycle (hr.)  
2.5  
Phase S of cell cycle (hr.)  
1.5  
Phase g2 of cell cycle (hr.)  
2.5  
Phase M of cell cycle (hr.)  
0.5  
Phase g1 of cell cycle stddev (hr.)  
1  
Phase S of cell cycle stddev (hr.)  
1  
Phase g2 of cell cycle stddev (hr.)  
1  
Phase M of cell cycle stddev (hr.)  
1  
Duration of CC collection of Antigen by serial encounters with FDC (hr.)  
0.7  
Standard deviation for delay to differentiation.

0  
Centroblast radius (um)

2.45  
Delay cell differentiation after TC selection (hr.)

6  
Lattice Dimensions

3  
Lattice Constant (um)

5  
Time resolution (hr)

0.002  
Length FDC dendrites / dx (number of positions)

8  
Retained Ag is deleted in fresh CC

1  
Conversion of shape space affinity to (1/mol)

5.5  
Conversion of shape space affinity to (1/mol)

9.5  
Exponent of the hamming distance

2  
Width of gaussian affinity weight function

2.8  
Initial Number Stromal cells

300  
Initial Number FDCs

200  
Initial Number T-cells

250  
Initial Number Centroblasts

0  
 $k_{on}$  for building immune complex (1/mol h)

36  
 $k_{off}$  for dissociation of immune complex (in /s):

3.6  
Rate of macrophage transport of dead cells (h):

0.000231049  
Maximum number of residues in one dimension

9  
Number of divisions of founder cells

12  
stddev of Number of divisions of founder cells

0  
Number of divisions of influx Bcells

6  
FounderCellsDoNotMutate

0  
Plasma Cell persistence time (unit)

0.16  
Plasma Cell speed (unit)

0.072  
Plasma Cell polarity (degrees)

-1  
Probability to be selected by FDC.

0.04

% Casp3+ LZ cells per hr. used as (apoptosis rate)

0

% Casp3+ DZ cells per hr. used as (apoptosis rate)

0

Differentiation rate

0.02

p-MHC dependent division number Hill (Hill coef. n\_P)

2

p-MHC dependent division number Hill (Hill coef. P\_Min)

1

p-MHC dependent division number Hill (Hill coef. P\_Max)

6

p-MHC dependent division number Hill (Hill coef. K\_P)

9

Probability of mutation before first 24 hours

0

Probability of mutation after first 24 hours

0.5

Probability of mutation after selection (affinity dependant)

0

Affinity dependant mutation upon TC contact (affinity-exponent)

1

Probability to divide Ag assymmetrically to daughter B-cell

0.72

Assymmetric Distribution of Ag

1

Lattice Radius (um)

160

rate of inflow (cells/hr.)

2

Start of mutation period (hr.)

24

smoothness of stop inflow CB (hr.) (-1 = no)

6

time to stop inflow CB (hr.)

96

T-Cell Speed (um / hr.)

0.24

T-Cell Persistent Time average (hr.)

0.0705882

deviation of T-cell speed (um/sec)

-1

T-Cell Persistent Time stddev (hr.)

0

Duration of CC-Tc contact (hr.)

0.6

Minimum duration of TC-CC-polarization for CC-rescue (hr.)

0.5

Maximum duration of GC simulation (hr.)

504

Rate for differentiation of centroblasts to centrocytes

0.1

Time gap between TFHC-CC binding tests (hr.)

10

Coefficient of variation around Polarity Index

0.04
